# Supplementary material for: Tobacco smoking and methylation of genes related to lung cancer development
Source: PubMed Central journal article supplement (PMC5312292; doi:10.18632/oncotarget.10007), 2016-06-14
Supplement: oncotarget-07-59017-s001.pdf [file oncotarget-07-59017-s001.pdf]

## **Tobacco smoking and methylation of genes related to lung cancer development**

### **SUPPLEMENTARY TABLES**

**Supplementary Table S1: Details of selected SNPs and genes (Excel).** This table includes four subsets: 1. Lung Cancer Susceptibility Genes Identified by GWASs; 2. Lung cancer SNPs and annotated genes; 3. List of considered CpG sites in/near lung cancer and cis-eQTL genes with exclusion reasons; 4. List of all CpG candidates with mixed linear regression results (Discovery panel).

See Supplementary File 1

**Supplementary Table S2: Significant associations between tobacco smoking and methylation of lung cancer related genes in discovery panel.**

See Supplementary File 2

**Supplementary Table S3: Correlation coefficients between methylation levels at validated CpG sites (Spearman's Rank-Order Correlation) in validation panel.**

See Supplementary File 3
